# Supplementary material
Source: Springer Nature journal article supplement (https://www.springermedizin.de/resource/supplementary/12879_2009_1031_MOESM13_ESM.pdf/9442434)

# Cases-Cases

## Dist. of Cluster Size Clasical Ogawa

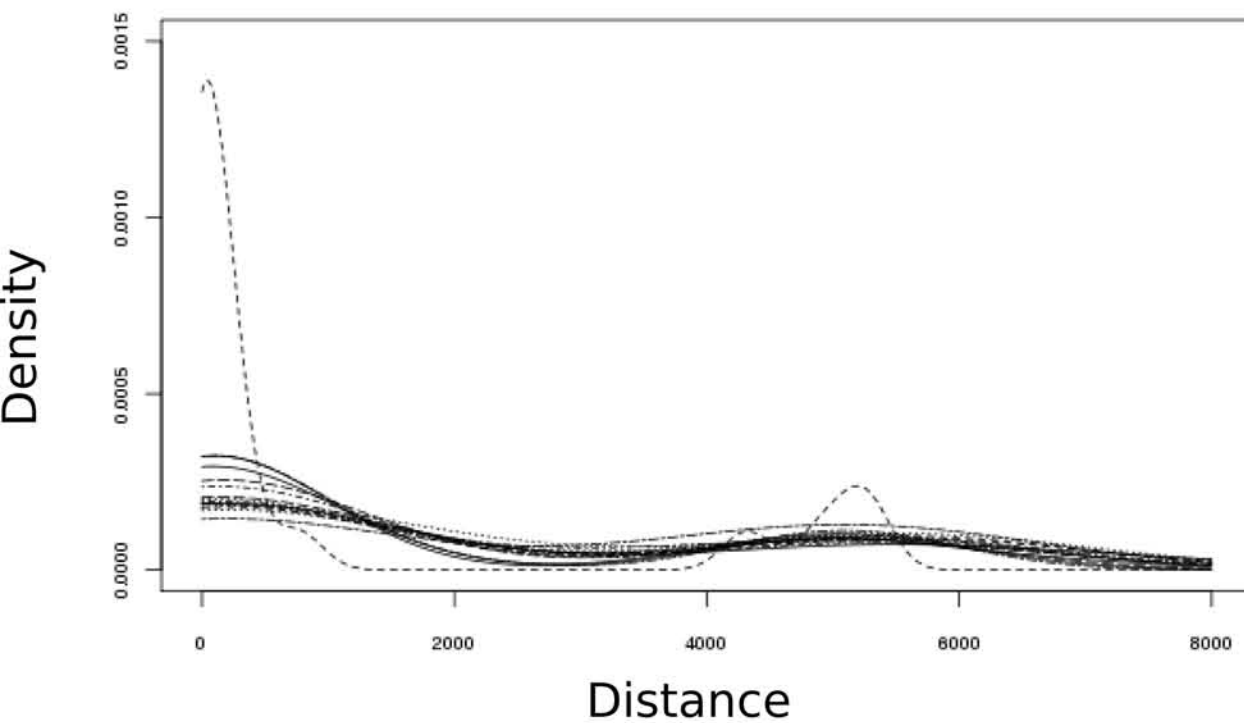

## Dist. of Cluster Size Clasical Inaba

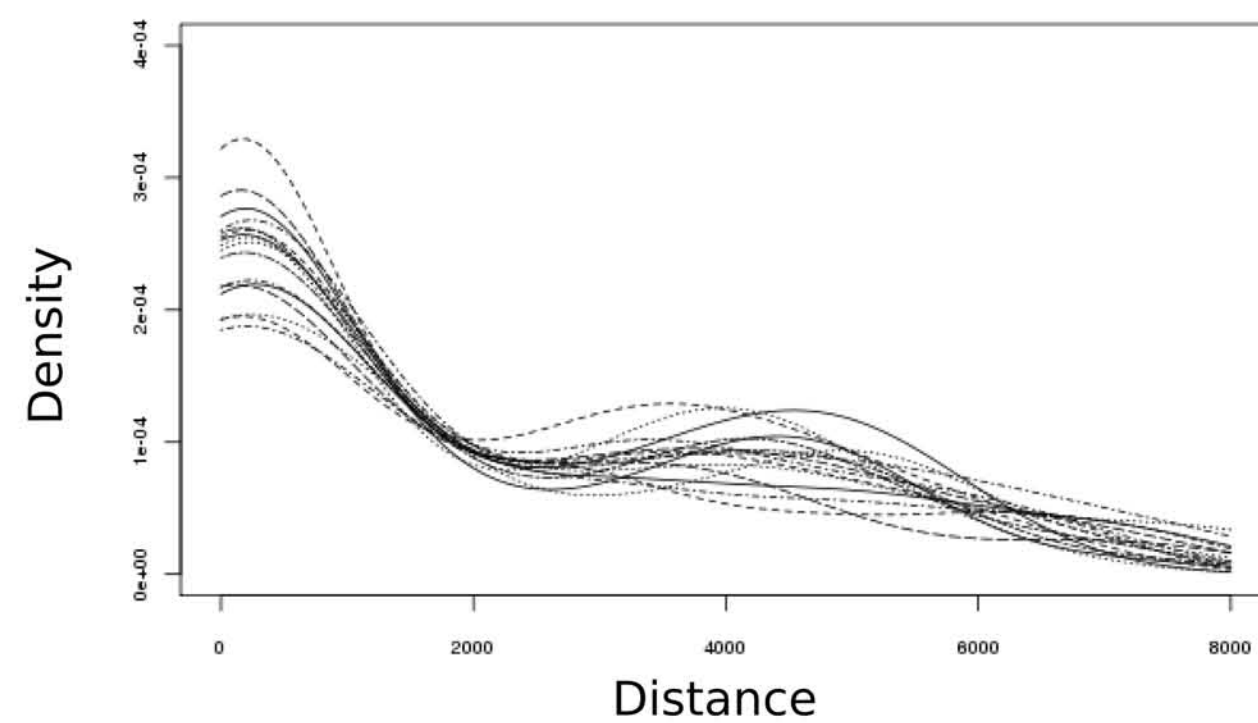

## Dist. of Cluster Size El Tor Inaba

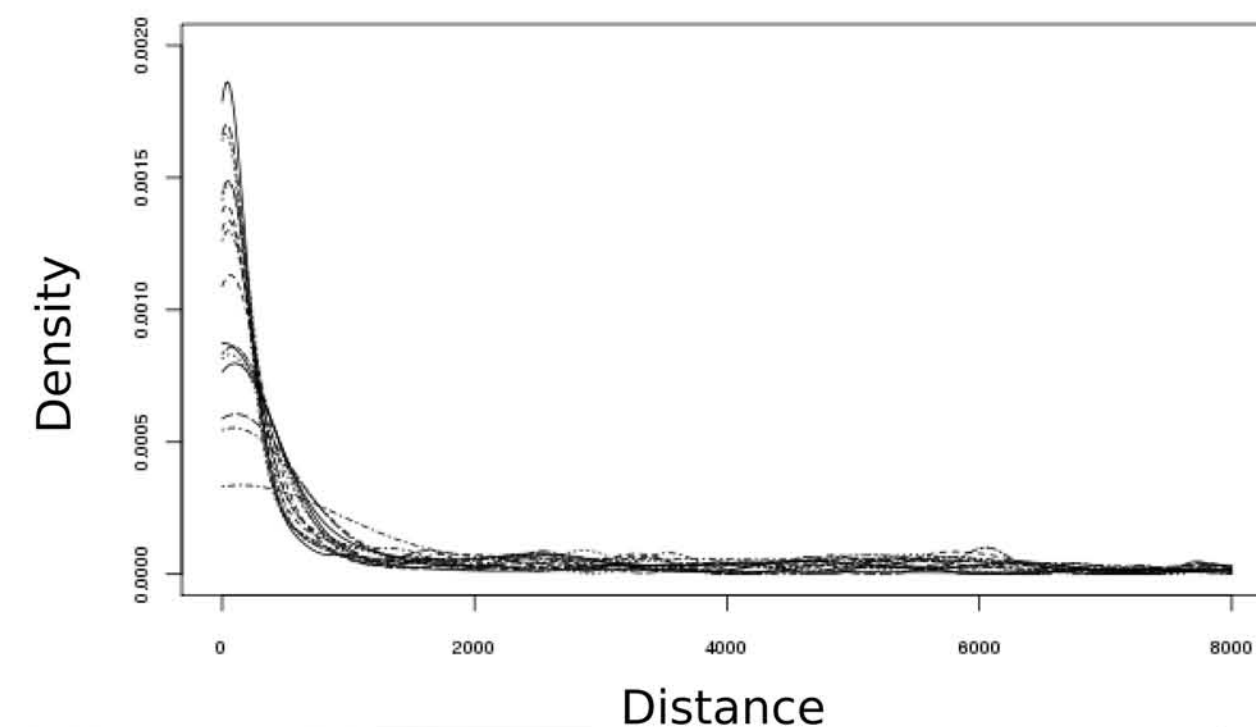

# Cases-Water

## Dist. of Cluster Size Clasical Ogawa

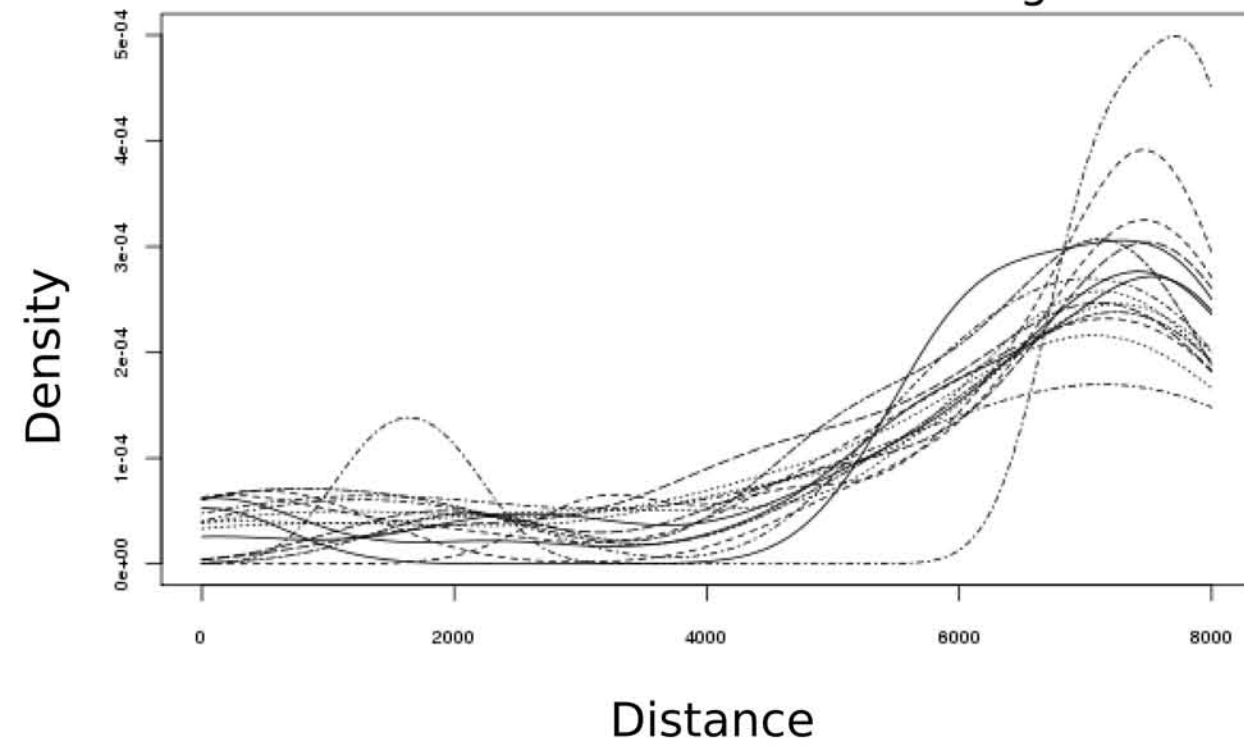

## Dist. of Cluster Size Clasical Inaba

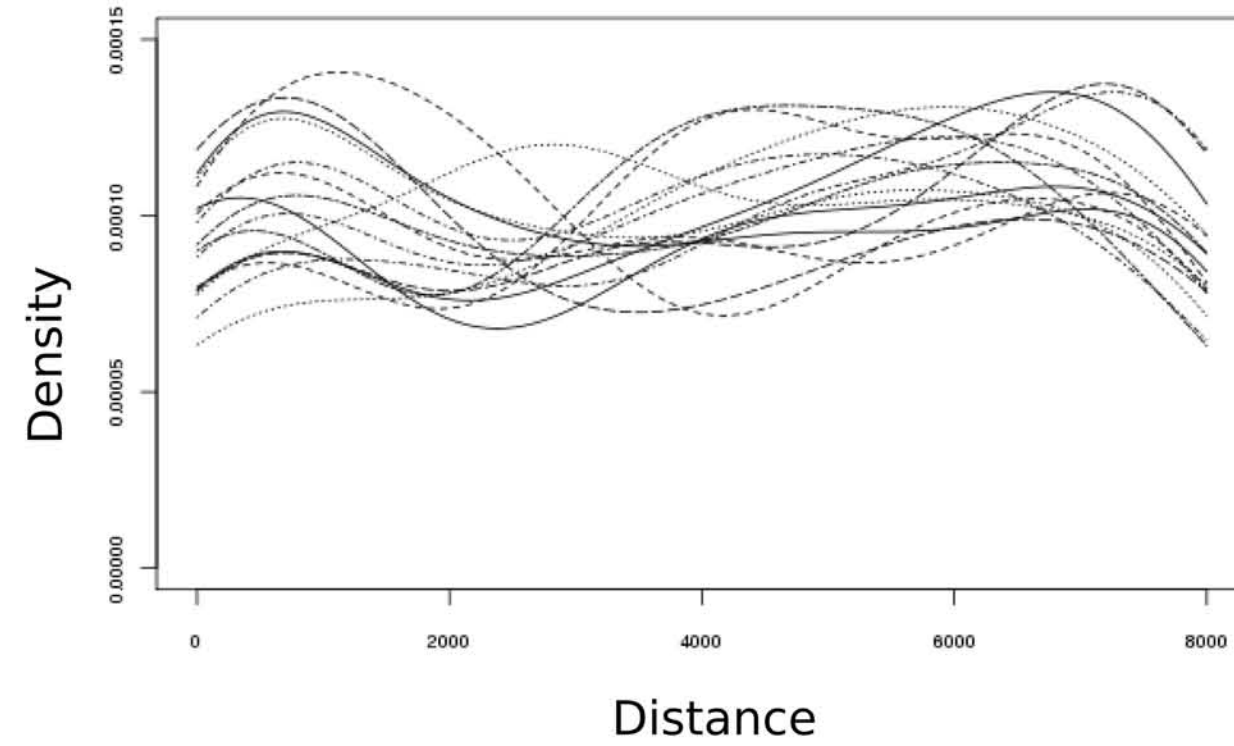

## Dist. of Cluster Size El Tor Inaba

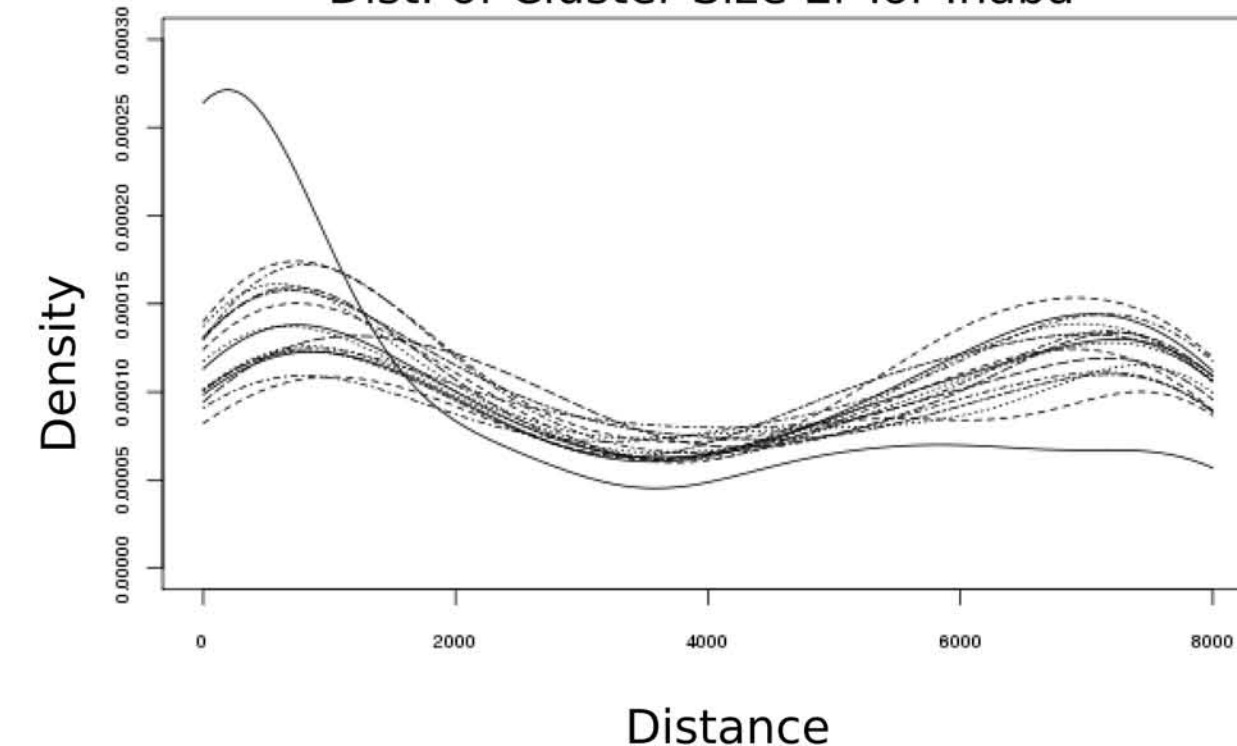

Supplement: MOESM13 [file 9442434]
